# Supplementary material
Source: PubMed Central journal article supplement (PMC4313156)
Supplement: JCM.01161-14_zjm999093686so1.pdf [file JCM.01161-14_zjm999093686so1.pdf]

## Supplemental Material

**Table S1. Etest and VITEK 2 antibiotic susceptibility testing results**

| Strains    | Ampicillin         |                 |                      | Cefotaxime |                |                | Ciprofloxacin |                |                |
|------------|--------------------|-----------------|----------------------|------------|----------------|----------------|---------------|----------------|----------------|
|            | Etest <sup>1</sup> |                 | VITEK 2 <sup>2</sup> | Etest      |                | VITEK 2        | Etest         |                | VITEK 2        |
|            | µg/ml              | Classification  | Classification       | µg/ml      | Classification | Classification | µg/ml         | Classification | Classification |
| ARD144     | > 256              | R               | R                    | 0.5        | S              | S              | > 32          | R              | R              |
| ARD145     | > 256              | R               | R                    | > 32       | R              | R              | 0.19          | S              | S/I            |
| ARD146     | > 256              | R               | R                    | 0.125      | S              | S              | 0.19          | S              | S              |
| ATCC 25922 | 8                  | NA <sup>3</sup> | NA                   | 0.19       | NA             | NA             | 0.012         | NA             | NA             |

<sup>1</sup>The MIC detected is shown in µg/ml and interpreted to classify a strain as susceptible (S), intermediate (I), or resistant (R) according to the CLSI guidelines.

<sup>2</sup>VITEK 2 results classify a strain as susceptible (S), intermediate (I), or resistant (R)

<sup>3</sup>Not applicable. S, I, or R classification does not apply for the Quality Control strains

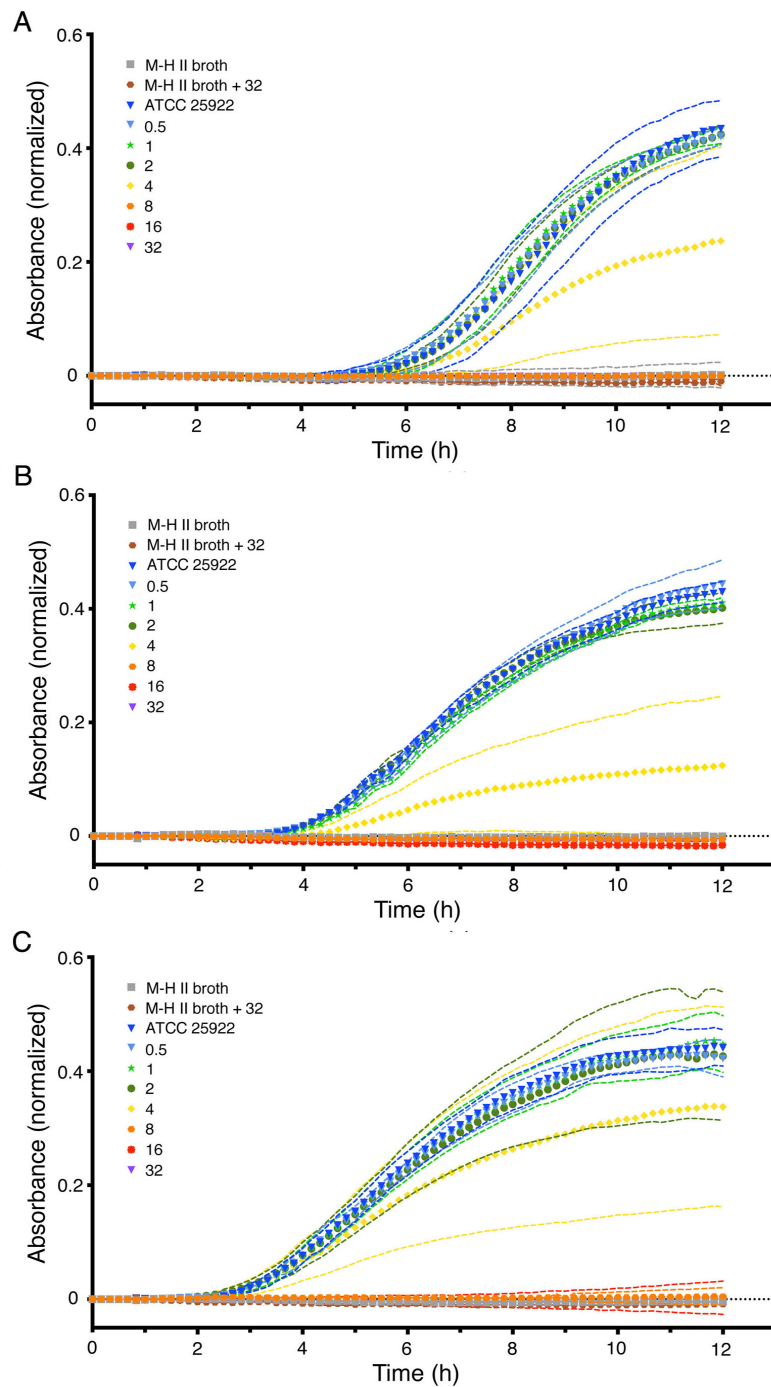

**FIG. S1** Susceptibility of ATCC 25922 to ampicillin using the nanowell AST device. Growth curves of the reference strain ATCC 25922 exposed to 0-32 µg/ml of ampicillin, using an inoculum of (A) 5 cfu/well, (B) 50 cfu/well and (C) 500 cfu/well. Each curve represents the average normalized OD<sub>600</sub> from 12 wells of a single experiment with standard deviations shown as two dashed lines (---) of the same color. Positive control (ATCC 25922) representing bacteria in M-H II broth, and negative controls (M-H II broth, M-H II broth +32) representing medium with and without ampicillin were included.

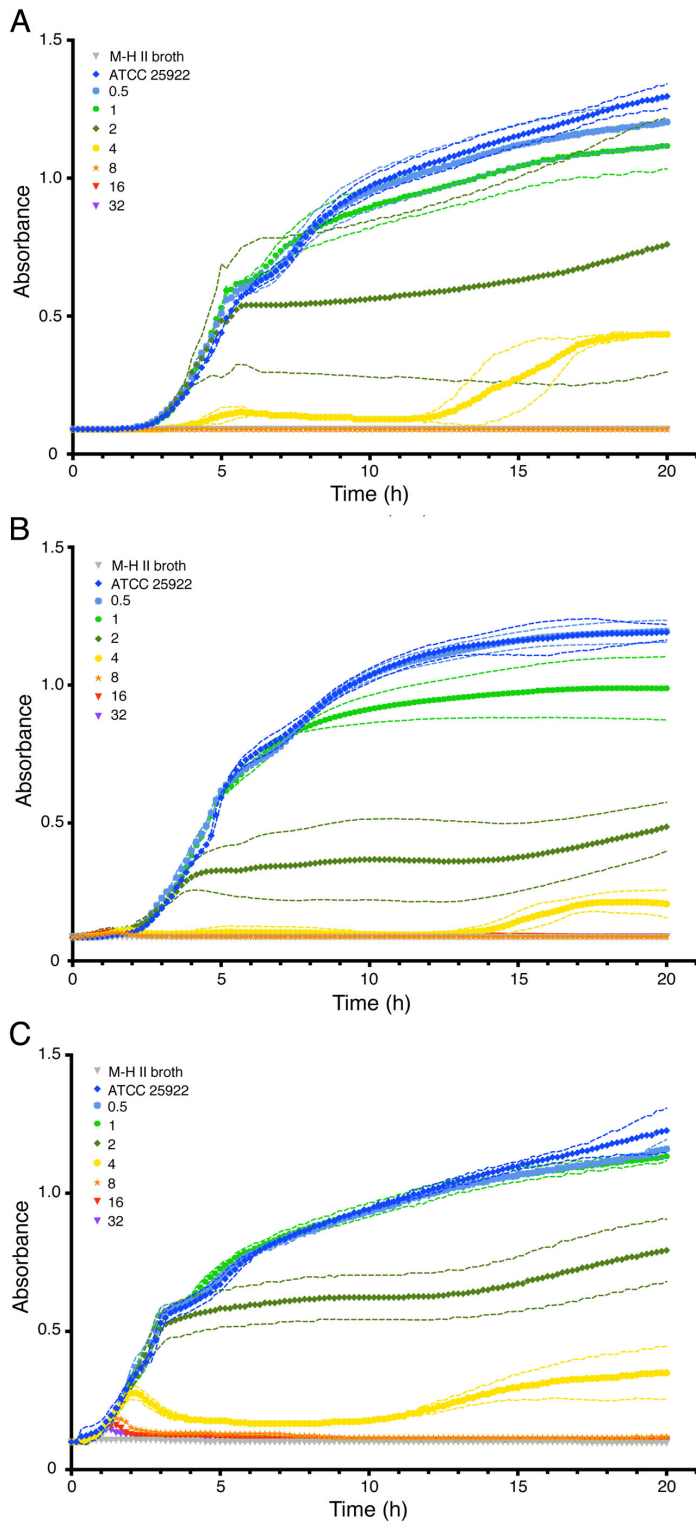

**FIG. S2** Ampicillin susceptibility of ATCC 25922 in a microbroth dilution assay. Growth of the reference strain ATCC 25922 subjected to 0-32  $\mu\text{g/ml}$  of ampicillin, using an inoculum of (A)  $10^4$  cfu/ml (B)  $10^5$  cfu/ml and (C)  $10^6$  cfu/ml. ATCC 25922 = M-H II broth + bacteria; M-H II broth = medium; 0.5-32 = M-H II broth + bacteria + indicated ampicillin concentration ( $\mu\text{g/ml}$ ). Each curve represents the average  $\text{OD}_{600}$  from triplicate wells from a single experiment. Standard deviation is illustrated as two dashed lines (---) of the same color as the growth curve.

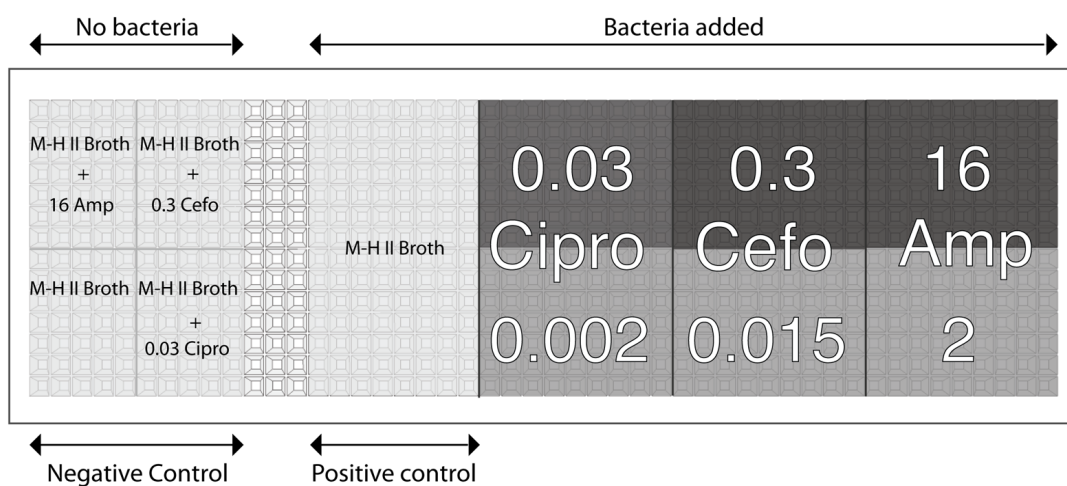

**FIG. S3** Schematic of the multiplex nanowell AST device. Two concentrations of ampicillin (2 and 16  $\mu\text{g/ml}$ ), ciprofloxacin (0.002 and 0.030  $\mu\text{g/ml}$ ) and cefotaxime (0.015 and 0.3  $\mu\text{g/ml}$ ), corresponding to values below (light grey) and above (dark grey) respective MICs against strain ATCC 25922, were used. Positive (ATCC 25922 in M-H II broth) and negative controls (M-H II broth, M-H II broth + 16 Amp, M-H II broth + 0.3 Cefo, M-H II broth + 0.03 Cipro) were included.
